# Supplementary material for: Parental Stress and Family Quality of Life: Surveying Family Members of Persons with Intellectual Disabilities
Source: PubMed Central journal article supplement (PMC7731363; doi:10.3390/ijerph17239007), 2020-12-03
Supplement: ijerph-17-09007-s001.pdf [file ijerph-17-09007-s001.pdf]

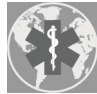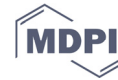

**Table S1.** Fully specified model.

| Variables                             | Block 1              |      |         |       |       | Block 2                |      |         |       |       | Block 3               |      |         |       |       |
|---------------------------------------|----------------------|------|---------|-------|-------|------------------------|------|---------|-------|-------|-----------------------|------|---------|-------|-------|
|                                       | B                    | SE   | $\beta$ | t     | p     | B                      | SE   | $\beta$ | t     | p     | B                     | SE   | $\beta$ | t     | p     |
| Individual characteristics            |                      |      |         |       |       |                        |      |         |       |       |                       |      |         |       |       |
| Gender                                | -0.43                | 0.89 | -0.02   | -0.48 | 0.63  | -0.82                  | 0.82 | -0.04   | -1.00 | 0.32  | -0.81                 | 0.66 | -0.04   | -1.23 | 0.22  |
| Age                                   | -0.04                | 0.03 | -0.06   | -1.29 | 0.20  | 0.00                   | 0.04 | 0.00    | -0.07 | 0.95  | 0.00                  | 0.03 | 0.00    | -0.04 | 0.97  |
| Severity of behavioral needs          | 0.68                 | 0.20 | 0.16    | 3.48  | <0.01 | 0.60                   | 0.18 | 0.14    | 3.29  | <0.01 | -0.24                 | 0.16 | -0.06   | -1.56 | 0.12  |
| Severity of medical needs             | 0.41                 | 0.26 | 0.07    | 1.54  | 0.12  | 0.58                   | 0.24 | 0.10    | 2.39  | 0.02  | 0.47                  | 0.20 | 0.08    | 2.37  | 0.02  |
| Severity of Intellectual disabilities | 1.60                 | 0.58 | 0.13    | 2.76  | 0.01  | 1.84                   | 0.55 | 0.14    | 3.36  | <0.01 | 1.20                  | 0.44 | 0.09    | 2.70  | 0.01  |
| Family Capabilities                   |                      |      |         |       |       |                        |      |         |       |       |                       |      |         |       |       |
| Gender of caregiver                   |                      |      |         |       |       | 1.53                   | 0.93 | 0.07    | 1.65  | 0.10  | 1.59                  | 0.75 | 0.07    | 2.12  | 0.03  |
| Age                                   |                      |      |         |       |       | -0.02                  | 0.04 | -0.02   | -0.39 | 0.69  | -0.02                 | 0.04 | -0.02   | -0.53 | 0.60  |
| Marital status                        |                      |      |         |       |       | -0.56                  | 0.93 | -0.03   | -0.61 | 0.55  | 0.28                  | 0.75 | 0.01    | 0.38  | 0.71  |
| Educational level                     |                      |      |         |       |       | -0.61                  | 0.37 | -0.07   | -1.63 | 0.10  | -0.50                 | 0.30 | -0.06   | -1.65 | 0.10  |
| Employment status                     |                      |      |         |       |       | 2.04                   | 0.93 | 0.10    | 2.19  | 0.03  | 1.38                  | 0.76 | 0.07    | 1.83  | 0.07  |
| Relationship                          |                      |      |         |       |       | -2.45                  | 0.95 | -0.14   | -2.59 | 0.01  | -1.39                 | 0.76 | -0.08   | -1.81 | 0.07  |
| Physical/Material Wellbeing           |                      |      |         |       |       | 0.48                   | 0.56 | 0.04    | 0.86  | 0.39  | 0.28                  | 0.51 | 0.02    | 0.55  | 0.58  |
| Family Interaction                    |                      |      |         |       |       | -2.99                  | 0.69 | -0.25   | -4.32 | <0.01 | -1.69                 | 0.58 | -0.14   | -2.93 | <0.01 |
| Parenting                             |                      |      |         |       |       | -1.52                  | 0.67 | -0.14   | -2.27 | 0.02  | -0.09                 | 0.61 | -0.01   | -0.14 | 0.89  |
| Family appraisal                      |                      |      |         |       |       |                        |      |         |       |       |                       |      |         |       |       |
| Dysfunctional interaction             |                      |      |         |       |       |                        |      |         |       |       | 0.41                  | 0.05 | 0.36    | 7.81  | <0.01 |
| Difficult behaviors                   |                      |      |         |       |       |                        |      |         |       |       | 0.28                  | 0.05 | 0.27    | 5.60  | <0.01 |
| Emotional well-being                  |                      |      |         |       |       |                        |      |         |       |       | -1.44                 | 0.45 | -0.14   | -3.21 | <0.01 |
| Disability-Related Support            |                      |      |         |       |       |                        |      |         |       |       | 0.44                  | 0.51 | 0.04    | 0.87  | 0.38  |
| R                                     | 0.260                |      |         |       |       | 0.479                  |      |         |       |       | 0.71                  |      |         |       |       |
| R <sup>2</sup>                        | 0.068 **             |      |         |       |       | 0.230 **               |      |         |       |       | 0.507 **              |      |         |       |       |
| Adj R <sup>2</sup>                    | 0.058                |      |         |       |       | 0.208                  |      |         |       |       | 0.489                 |      |         |       |       |
| SE                                    | 9.8                  |      |         |       |       | 9.02                   |      |         |       |       | 7.25                  |      |         |       |       |
| F(df <sub>n</sub> ,df <sub>d</sub> )  | F(3, 503) = 7.288 ** |      |         |       |       | F(14, 494) = 10.513 ** |      |         |       |       | F(18,490) = 27.979 ** |      |         |       |       |

\*\*  $p < 0.001$ .
